# Supplementary material for: Do Patients Benefit from Micronutrient Supplementation following Pancreatico-Duodenectomy?
Source: MDPI journal article supplement (doi:10.3390/nu15122804), 2023-06-19
Supplement: s1 [file s1]

**Table s1: Frequency of micronutrient deficiencies**

|                             | Year 1<br>(n=84) | Year 2<br>(n=97) | Year 3<br>(n=85) | Year 4<br>(n=84) | Year 5<br>(n=57) | Year 6<br>(n=46) | Year 7<br>(n=38) | Year 8<br>(n=29) | Year 9<br>(n=21) | Year 10<br>(n=21) | Year 11<br>(n=13) | Year 12<br>(n=13) | Year 13<br>(n=7) | Year 14<br>(n=5) | TOTAL cases  |
|-----------------------------|------------------|------------------|------------------|------------------|------------------|------------------|------------------|------------------|------------------|-------------------|-------------------|-------------------|------------------|------------------|--------------|
| <b>Fat soluble vitamins</b> |                  |                  |                  |                  |                  |                  |                  |                  |                  |                   |                   |                   |                  |                  |              |
| Vitamin A                   | 1/36             | 2/71             | 2/62             | 1/36             | 2/46             | 0/30             | 0/27             | 1/19             | 1/15             | 0/11              | 0/11              | 0/9               | 0/5              | 0/4              | 10/382, 3%   |
| Vitamin D                   | 14/29            | 35/64            | 31/59            | 14/29            | 21/37            | 17/26            | 16/21            | 7/13             | 9/11             | 5/9               | 3/7               | 2/6               | 1/5              | 2/5              | 177/384, 46% |
| Vitamin E                   | 0/35             | 0/69             | 1/62             | 0/35             | 0/45             | 0/28             | 0/25             | 2/19             | 0/14             | 1/10              | 1/11              | 0/9               | 1/5              | 1/4              | 7/371, 2%    |
| <b>Bone Health</b>          |                  |                  |                  |                  |                  |                  |                  |                  |                  |                   |                   |                   |                  |                  |              |
| Vitamin D                   | 14/29            | 35/64            | 31/59            | 14/29            | 21/37            | 17/26            | 16/21            | 7/13             | 9/11             | 5/9               | 3/7               | 2/6               | 1/5              | 2/5              | 177/384, 46% |
| Hyperparathyroid            | 1/21             | 5/49             | 5/45             | 1/21             | 4/24             | 2/19             | 2/17             | 0/10             | 1/11             | 0/6               | 2/4               | 3/4               | 0/2              | 1/4              | 27/237, 11%  |
| <b>Anaemia screen</b>       |                  |                  |                  |                  |                  |                  |                  |                  |                  |                   |                   |                   |                  |                  |              |
| Iron deficiency             | 22/41            | 37/65            | 24/65            | 11/34            | 10/29            | 10/25            | 6/20             | 7/16             | 3/12             | 3/9               | 1/7               | 2/5               | 2/5              | 3/5              | 141/338, 42% |
| Iron deficiency anaemia     | 11/34            | 14/60            | 5/45             | 22/41            | 2/28             | 0/30             | 1/21             | 3/14             | 0/8              | 2/9               | 0/3               | 1/6               | 1/3              | 2/4              | 64/306, 21%  |
| Vitamin B12 deficiency      | 2/12             | 1/76             | 0/60             | 0/50             | 0/46             | 0/34             | 0/28             | 0/22             | 0/16             | 0/12              | 0/10              | 0/9               | 0/5              | 0/3              | 3/383, 1%    |
| Folate deficiency           | 0/32             | 1/60             | 0/53             | 0/32             | 0/29             | 0/28             | 0/18             | 0/14             | 0/9              | 0/8               | 0/5               | 0/13              | 0/4              | 0/5              | 1/310, 0.3%  |
| <b>Trace elements</b>       |                  |                  |                  |                  |                  |                  |                  |                  |                  |                   |                   |                   |                  |                  |              |
| Copper                      | Nil              | 1/18             | 0/22             | 0/0              | 0/14             | 0/10             | 0/10             | 0/2              | 0/4              | 0/3               | 0/4               | 0/0               | 0/2              | 0/4              | 1/93, 1%     |
| Magnesium                   | 6/41             | 2/45             | 2/40             | 0/26             | 3/27             | 2/23             | 1/24             | 0/15             | 0/12             | 0/8               | 0/8               | 1/7               | 1/2              | 0/4              | 18/282, 6%   |
| Selenium                    | 4/36             | 1/69             | 1/58             | 0/36             | 0/41             | 0/27             | 0/26             | 1/17             | 0/13             | 0/10              | 0/11              | 0/9               | 1/5              | 0/3              | 12/361, 3%   |
| Zinc                        | 19/35            | 26/69            | 20/61            | 19/35            | 16/40            | 14/30            | 6/26             | 8/18             | 7/13             | 6/9               | 6/11              | 5/9               | 4/5              | 3/3              | 159/364, 44% |
| <b>Other factors</b>        |                  |                  |                  |                  |                  |                  |                  |                  |                  |                   |                   |                   |                  |                  |              |
| High folate                 | 11/32            | 18/60            | 21/53            | 11/32            | 21/29            | 14/28            | 10/18            | 9/14             | 4/9              | 4/8               | 4/5               | 5/13              | 1/4              | 2/5              | 135/310, 44% |
| High HbA1c                  | 15/22            | 20/37            | 18/38            | 17/21            | 16/28            | 14/22            | 11/16            | 10/14            | 11/8             | 9/5               | 3/9               | 7/9               | 5/6              | 4/4              | 160/380, 42% |
